# Supplementary material for: Real-world bleeding in patients with acute coronary syndrome (ACS) undergoing percutaneous coronary intervention (PCI) and prescribed different combinations of dual antiplatelet therapy (DAPT) in England: a population-based cohort study emulating a ‘target trial’
Source: HighWire-hosted journal article supplement (doi:10.1136/openhrt-2022-001999), 2022-08-01

## Online Supplementary Material

| <b>Table of contents</b>                                                                                                                                                                                                     | <b>Page number</b> |
|------------------------------------------------------------------------------------------------------------------------------------------------------------------------------------------------------------------------------|--------------------|
| Diagnoses and procedure codes used to identify the populations                                                                                                                                                               | 2                  |
| <i>Supplementary Figure 1.</i> Propensity scores distribution for the ACS population.                                                                                                                                        | 3                  |
| <i>Supplementary Figure 2.</i> Propensity scores distribution for the STEMI population.                                                                                                                                      | 4                  |
| <i>Supplementary Table 1.</i> Baseline characteristics of included and excluded participants                                                                                                                                 | 5                  |
| <i>Supplementary Table 2.</i> Rates of HES-recorded bleeding, CPRD-recorded bleeding and total bleeding (HES and CPRD) in included and excluded participants                                                                 | 7                  |
| <i>Supplementary Table 3.</i> Crude and adjusted hazard ratios for association of antiplatelet prescription (AC vs. AP and AC vs AT) sensitivity analyses for the primary outcome in ACS and STEMI-only patients (2012-2017) | 8                  |
| <i>Supplementary Figure 3.</i> Kaplan-Meier curves displaying cumulative all cause and cardiovascular mortality, mortality from bleeding and ischaemic events according to intervention group.                               | 9                  |
| <i>Supplementary Figure 4.</i> Kaplan-Meier curves displaying cumulative all cause and cardiovascular mortality, mortality from bleeding and ischaemic events according to intervention group in the STEMI-only population   | 10                 |

**Diagnoses and procedure codes used to identify the populations****Office of Population Censuses and Surveys (OPCS) procedure codes for PCI:**

- K49 Transluminal balloon angioplasty of coronary artery
- K50 Other therapeutic transluminal operations on coronary artery
- K75 Percutaneous transluminal balloon angioplasty and insertion of stent into coronary artery

**International Classification of Diseases (ICD-10) codes for ACS:**

- I20.0 Unstable angina
- I21 Acute myocardial infarction
- I22 Subsequent myocardial infarction
- I24.9 Acute ischaemic heart disease, unspecified

**STEMI-only:**

- I21.0 Acute transmural myocardial infarction of anterior wall
- I21.1 Acute transmural myocardial infarction of inferior wall
- I21.2 Acute transmural myocardial infarction of other sites
- I21.3 Acute transmural myocardial infarction of unspecified site
- I22.0 Subsequent myocardial infarction of anterior wall
- I22.1 Subsequent myocardial infarction of inferior wall
- I22.8 Subsequent myocardial infarction of other sites

Supplementary Figure 1. Propensity scores distribution for the ACS population

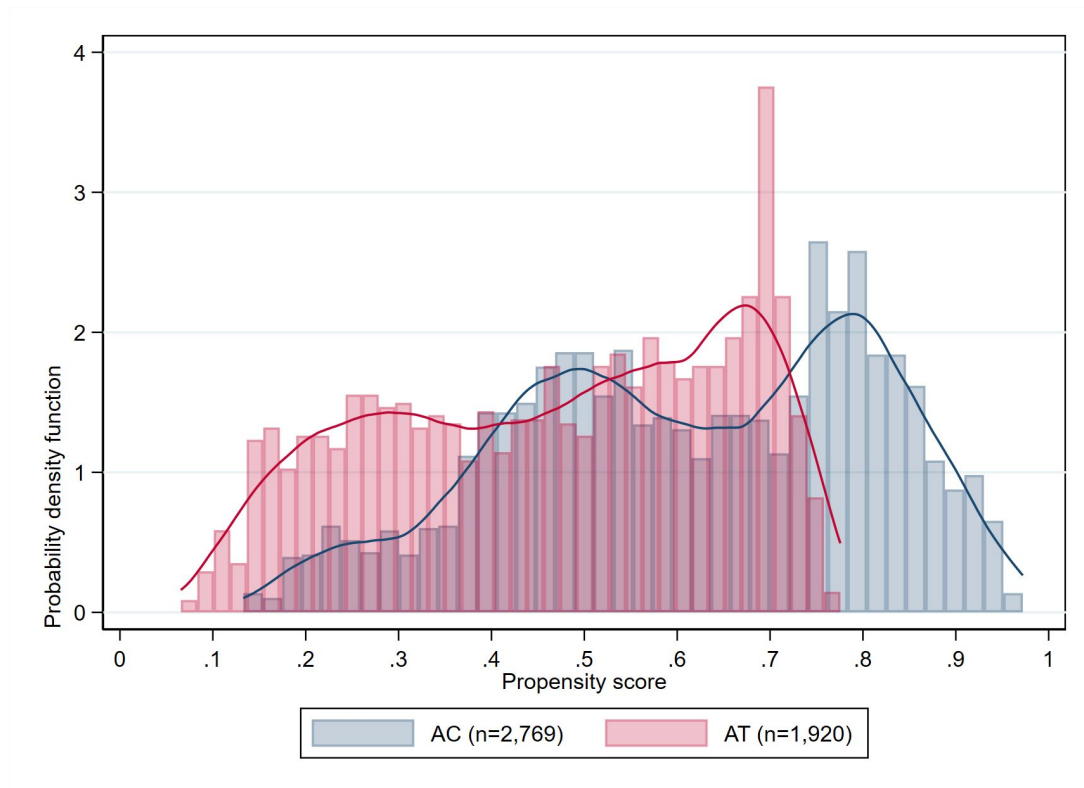

ACS: acute coronary syndrome; AC: aspirin and clopidogrel; AT: aspirin and ticagrelor

Supplementary Figure 2. Propensity scores distribution for the STEMI population

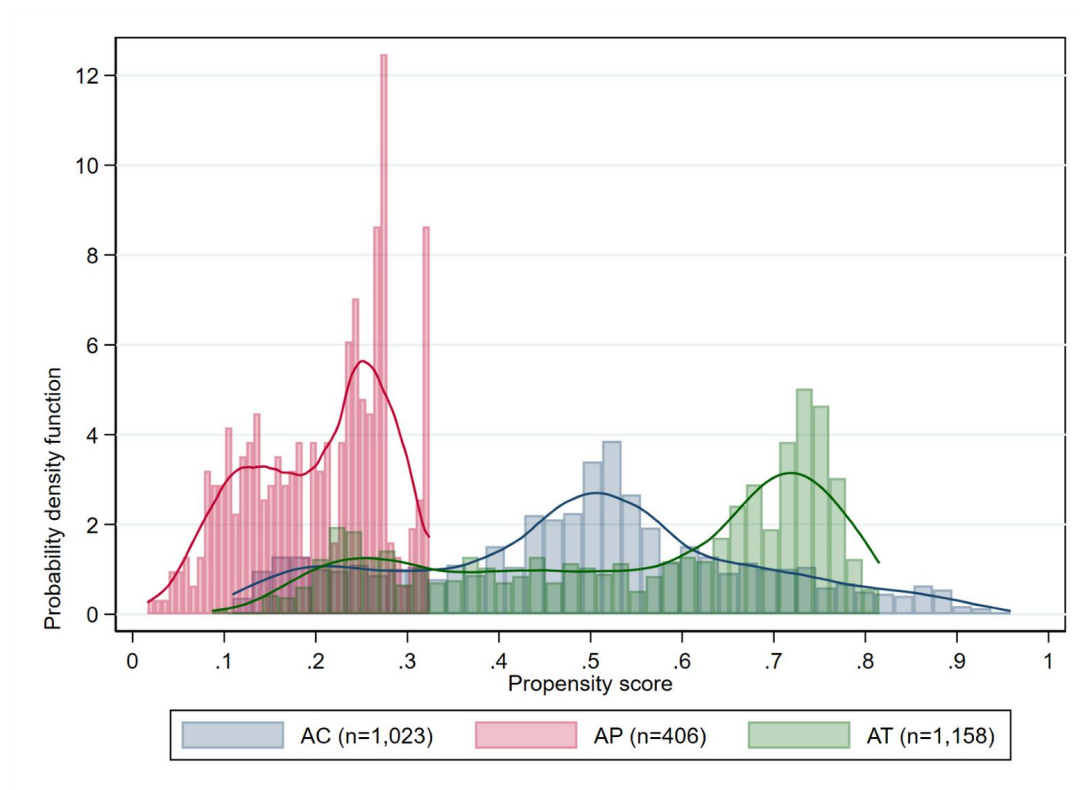

AC: aspirin and clopidogrel; AP: aspirin and prasugrel; AT: aspirin and prasugrel; STEMI: ST-elevation myocardial infarction

Supplementary Table 1. Baseline characteristics of included and excluded participants

|                                                 |            | Acute coronary syndrome (ACS) |                                                                                                    |                                       |                                                                              |                         | STEMI-only         |                                                                                                        |                          |                                                                               |                          |
|-------------------------------------------------|------------|-------------------------------|----------------------------------------------------------------------------------------------------|---------------------------------------|------------------------------------------------------------------------------|-------------------------|--------------------|--------------------------------------------------------------------------------------------------------|--------------------------|-------------------------------------------------------------------------------|--------------------------|
|                                                 |            | Included<br>n=4689            | Ischaemic/<br>major bleed<br>event or<br>death before<br>first<br>prescription<br>in CPRD<br>n=250 | SMD <sup>1</sup><br>(vs.<br>Included) | No<br>prescription<br>in CPRD<br>within 2<br>months of<br>discharge<br>n=270 | SMD<br>(vs<br>Included) | Included<br>n=2587 | Ischaemic/<br>major<br>bleed<br>event or<br>death<br>before first<br>prescriptio<br>n in CPRD<br>n=161 | SMD<br>(vs.<br>Included) | No<br>prescriptio<br>n in CPRD<br>within 2<br>months of<br>discharge<br>n=145 | SMD<br>(vs.<br>Included) |
| Demography                                      |            |                               |                                                                                                    |                                       |                                                                              |                         |                    |                                                                                                        |                          |                                                                               |                          |
| Year of event; n (%)                            | 2012/13    | 1303 (28%)                    | 67 (27%)                                                                                           | 0.09                                  | 69 (26%)                                                                     | 0.11                    | 713 (28%)          | 44 (27%)                                                                                               | 0.09                     | 40 (28%)                                                                      | 0.12                     |
|                                                 | 2013/14    | 1147 (24%)                    | 60 (24%)                                                                                           |                                       | 64 (24%)                                                                     |                         | 629 (24%)          | 35 (22%)                                                                                               |                          | 35 (24%)                                                                      |                          |
|                                                 | 2014/15    | 1025 (22%)                    | 61 (24%)                                                                                           |                                       | 57 (21%)                                                                     |                         | 564 (22%)          | 39 (24%)                                                                                               |                          | 26 (18%)                                                                      |                          |
|                                                 | 2015/16    | 733 (16%)                     | 41 (16%)                                                                                           |                                       | 43 (16%)                                                                     |                         | 423 (16%)          | 29 (18%)                                                                                               |                          | 27 (19%)                                                                      |                          |
|                                                 | 2016/17    | 481 (10%)                     | 21 (8%)                                                                                            |                                       | 37 (14%)                                                                     |                         | 258 (10%)          | 14 (9%)                                                                                                |                          | 17 (12%)                                                                      |                          |
| Age, yrs (mean; SD)                             |            | 64.6 (12.4)                   | 72.3 (12.9)                                                                                        | 0.61                                  | 62.9 (13.6)                                                                  | 0.13                    | 63.0 (12.3)        | 72.5 (13.7)                                                                                            | 0.72                     | 61.2 (13.3)                                                                   | 0.14                     |
| Sex; n (%)                                      | Male       | 3418 (73%)                    | 167 (67%)                                                                                          | 0.13                                  | 207 (77%)                                                                    | 0.09                    | 1923 (74%)         | 97 (60%)                                                                                               | 0.30                     | 116 (80%)                                                                     | 0.14                     |
|                                                 | Female     | 1271 (27%)                    | 83 (33%)                                                                                           |                                       | 63 (23%)                                                                     |                         | 664 (26%)          | 64 (40%)                                                                                               |                          | 29 (20%)                                                                      |                          |
| BMI <sup>a</sup> , kgm <sup>-2</sup> (mean; SD) |            | 28.4 (5.2)                    | 27.6 (5.3)                                                                                         | 0.16                                  | 27.3 (5.2)                                                                   | 0.20                    | 28.0 (4.9)         | 27.2 (4.9)                                                                                             | 0.15                     | 27.3 (4.9)                                                                    | 0.13                     |
| Ethnic group; n (%)                             | White      | 4275 (91%)                    | 226 (90%)                                                                                          | 0.03                                  | 244 (90%)                                                                    | 0.03                    | 2382 (92%)         | 149 (93%)                                                                                              | 0.02                     | 132 (91%)                                                                     | 0.04                     |
|                                                 | Non-white  | 414 (9%)                      | 24 (10%)                                                                                           |                                       | 26 (10%)                                                                     |                         | 205 (8%)           | 12 (7%)                                                                                                |                          | 13 (9%)                                                                       |                          |
| Smoking category <sup>b</sup> ; n (%)           | Ex-smoker  | 1443 (32%)                    | 92 (38%)                                                                                           | 0.14                                  | 72 (28%)                                                                     | 0.18                    | 722 (29%)          | 54 (36%)                                                                                               | 0.16                     | 37 (27%)                                                                      | 0.19                     |
|                                                 | Non-smoker | 1699 (38%)                    | 79 (33%)                                                                                           |                                       | 83 (33%)                                                                     |                         | 829 (34%)          | 52 (34%)                                                                                               |                          | 36 (27%)                                                                      |                          |
|                                                 | Smoker     | 1357 (30%)                    | 68 (28%)                                                                                           |                                       | 98 (39%)                                                                     |                         | 909 (37%)          | 46 (30%)                                                                                               |                          | 62 (46%)                                                                      |                          |
| Medical History                                 |            |                               |                                                                                                    |                                       |                                                                              |                         |                    |                                                                                                        |                          |                                                                               |                          |
| History of MI (ever); n (%)                     |            | 3616 (77%)                    | 149 (60%)                                                                                          | 0.39                                  | 167 (62%)                                                                    | 0.34                    | 1941 (75%)         | 88 (55%)                                                                                               | 0.44                     | 75 (52%)                                                                      | 0.50                     |
| History of CABG/PCI (ever); n (%)               |            | 1472 (31%)                    | 93 (37%)                                                                                           | 0.12                                  | 69 (26%)                                                                     | 0.13                    | 593 (23%)          | 58 (36%)                                                                                               | 0.29                     | 29 (20%)                                                                      | 0.07                     |
| Bleeding; n (%)                                 |            | 92 (2%)                       | 2 (1%)                                                                                             | 0.10                                  | 8 (3%)                                                                       | 0.06                    | 63 (2%)            | -                                                                                                      | 0.22                     | 6 (4%)                                                                        | 0.10                     |
| Previous surgery; n (%)                         |            | 178 (4%)                      | 17 (7%)                                                                                            | 0.13                                  | 9 (3%)                                                                       | 0.02                    | 75 (3%)            | 10 (6%)                                                                                                | 0.16                     | 2 (1%)                                                                        | 0.11                     |
| History of IHD (ever); n (%)                    |            | 4084 (87%)                    | 165 (66%)                                                                                          | 0.51                                  | 187 (69%)                                                                    | 0.44                    | 2052 (79%)         | 97 (60%)                                                                                               | 0.42                     | 77 (53%)                                                                      | 0.58                     |
| Diabetes; n (%)                                 |            | 924 (20%)                     | 59 (24%)                                                                                           | 0.09                                  | 33 (12%)                                                                     | 0.21                    | 397 (15%)          | 32 (20%)                                                                                               | 0.12                     | 9 (6%)                                                                        | 0.30                     |
| Hypertension; n (%)                             |            | 1857 (40%)                    | 108 (43%)                                                                                          | 0.07                                  | 78 (29%)                                                                     | 0.23                    | 705 (27%)          | 69 (43%)                                                                                               | 0.33                     | 22 (15%)                                                                      | 0.30                     |
| Hypercholesterolaemia; n (%)                    |            | 903 (19%)                     | 34 (14%)                                                                                           | 0.15                                  | 35 (13%)                                                                     | 0.17                    | 263 (10%)          | 13 (8%)                                                                                                | 0.07                     | 13 (9%)                                                                       | 0.04                     |

|                                       | Acute coronary syndrome (ACS) |                                                                                                    |                                       |                                                                              |                         | STEMI-only         |                                                                                                        |                          |                                                                               |                          |
|---------------------------------------|-------------------------------|----------------------------------------------------------------------------------------------------|---------------------------------------|------------------------------------------------------------------------------|-------------------------|--------------------|--------------------------------------------------------------------------------------------------------|--------------------------|-------------------------------------------------------------------------------|--------------------------|
|                                       | Included<br>n=4689            | Ischaemic/<br>major bleed<br>event or<br>death before<br>first<br>prescription<br>in CPRD<br>n=250 | SMD <sup>1</sup><br>(vs.<br>Included) | No<br>prescription<br>in CPRD<br>within 2<br>months of<br>discharge<br>n=270 | SMD<br>(vs<br>Included) | Included<br>n=2587 | Ischaemic/<br>major<br>bleed<br>event or<br>death<br>before first<br>prescriptio<br>n in CPRD<br>n=161 | SMD<br>(vs.<br>Included) | No<br>prescriptio<br>n in CPRD<br>within 2<br>months of<br>discharge<br>n=145 | SMD<br>(vs.<br>Included) |
| Peripheral vascular disease; n (%)    | 198 (4%)                      | 15 (6%)                                                                                            | 0.08                                  | 10 (4%)                                                                      | 0.03                    | 72 (3%)            | 7 (4%)                                                                                                 | 0.08                     | 8 (6%)                                                                        | 0.14                     |
| Stroke; n (%)                         | 17 (0.4%)                     | 3 (1%)                                                                                             | 0.10                                  | 1 (0.4%)                                                                     | 0.001                   | 11 (0.4%)          | 1 (1%)                                                                                                 | 0.03                     | 1 (1%)                                                                        | 0.04                     |
| Heart failure; n (%)                  | 308 (7%)                      | 34 (14%)                                                                                           | 0.24                                  | 24 (9%)                                                                      | 0.09                    | 155 (6%)           | 20 (12%)                                                                                               | 0.22                     | 8 (6%)                                                                        | 0.02                     |
| Peptic ulcer disease; n (%)           | 14 (0.3%)                     | 2 (1%)                                                                                             | 0.07                                  | 0 (0%)                                                                       | 0.08                    | 3 (0.1%)           | 0 (0%)                                                                                                 | 0.05                     | 0 (0%)                                                                        | 0.05                     |
| Haemodialysis or renal disease; n (%) | 196 (4%)                      | 23 (9%)                                                                                            | 0.20                                  | 8 (3%)                                                                       | 0.07                    | 55 (2%)            | 12 (7%)                                                                                                | 0.25                     | 2 (1%)                                                                        | 0.06                     |
| Cancer; n (%)                         | 191 (4%)                      | 22 (9%)                                                                                            | 0.19                                  | 17 (6%)                                                                      | 0.10                    | 80 (3%)            | 14 (9%)                                                                                                | 0.24                     | 4 (3%)                                                                        | 0.02                     |
| Clotting disorder; n (%)              | 9 (0.2%)                      | 1 (0.4%)                                                                                           | 0.04                                  | 0 (0%)                                                                       | 0.06                    | 5 (0.2%)           | 0 (0%)                                                                                                 | 0.06                     | 0 (0%)                                                                        | 0.06                     |
| Anaemia; n (%)                        | 106 (2%)                      | 11 (4%)                                                                                            | 0.12                                  | 8 (3%)                                                                       | 0.04                    | 25 (1%)            | 3 (2%)                                                                                                 | 0.08                     | 3 (2%)                                                                        | 0.09                     |
| Liver cirrhosis; n (%)                | 1 (0.02%)                     | 2 (1%)                                                                                             | 0.08                                  | 0 (0%)                                                                       | 0.02                    | 0 (0%)             | 1 (1%)                                                                                                 | -                        | 0 (0%)                                                                        | -                        |
| NSAIDs; n (%)                         | 903 (19%)                     | 40 (16%)                                                                                           | 0.09                                  | 34 (13%)                                                                     | 0.18                    | 450 (17%)          | 21 (13%)                                                                                               | 0.12                     | 13 (9%)                                                                       | 0.25                     |
| Steroids; n (%)                       | 417 (9%)                      | 34 (14%)                                                                                           | 0.15                                  | 25 (9%)                                                                      | 0.01                    | 209 (8%)           | 20 (12%)                                                                                               | 0.14                     | 11 (8%)                                                                       | 0.02                     |
| PPIs; n (%)                           | 1612 (34%)                    | 93 (37%)                                                                                           | 0.06                                  | 65 (24%)                                                                     | 0.23                    | 785 (30%)          | 54 (34%)                                                                                               | 0.07                     | 29 (20%)                                                                      | 0.24                     |
| Anticoagulants; n (%)                 | 23 (0.5%)                     | 7 (3%)                                                                                             | 0.18                                  | 1 (0.4%)                                                                     | 0.02                    | 11 (0.4%)          | 6 (4%)                                                                                                 | 0.23                     | 0 (0%)                                                                        | 0.09                     |

AC: aspirin and clopidogrel; AP: aspirin and prasugrel; AT: aspirin and ticagrelor; BMI: body mass index; CABG: coronary artery bypass graft; MI: myocardial infarction; NSAID: Nonsteroidal anti-inflammatory drugs; PCI: percutaneous coronary intervention; PPI: proton-pump inhibitor drugs. Missing data: <sup>a</sup> 407 patients; <sup>b</sup> 212 patients

<sup>1</sup> Restricted to 2012-2017

<sup>2</sup> DAPT is unknown for those who bleed before first prescription / further ACS before prescription / died before 2 months and no prescription / no DAPT in GP notes in first 2 months post-discharge (see *sensitivity analysis 1*)

<sup>3</sup> Unknown intervention (n=520) vs known intervention (n=5218)

*Supplementary Table 2.* Rates of HES-recorded bleeding, CPRD-recorded bleeding and total bleeding (HES and CPRD) in included and excluded participants

|                                         | Acute coronary syndrome (ACS)                                                    |                                                               |                 | STEMI-only                                                                       |                                                               |                 |
|-----------------------------------------|----------------------------------------------------------------------------------|---------------------------------------------------------------|-----------------|----------------------------------------------------------------------------------|---------------------------------------------------------------|-----------------|
|                                         | Ischaemic/ major bleed event or death before first prescription in CPRD<br>n=250 | No prescription in CPRD within 2 months of discharge<br>n=270 | Included n=4689 | Ischaemic/ major bleed event or death before first prescription in CPRD<br>n=161 | No prescription in CPRD within 2 months of discharge<br>n=145 | Included n=2587 |
| Any bleeding; n (%)                     | 5 (2%)                                                                           | 9 (3%)                                                        | 416 (9%)        | 3 (2%)                                                                           | 6 (4%)                                                        | 260 (10%)       |
| Major bleeding (HES-recorded); n (%)    | 6 (2%)                                                                           | 11 (4%)                                                       | 117 (2%)        | 4 (2%)                                                                           | 5 (3%)                                                        | 70 (3%)         |
| Minor bleeding (CPRD-recorded); n (%)   | 1 (0%)                                                                           | 2 (1%)                                                        | 332 (7%)        | 0                                                                                | 2 (1%)                                                        | 208 (8%)        |
| All-cause mortality; n (%)              | 219 (88%)                                                                        | 11 (4%)                                                       | 104 (2%)        | 141 (88%)                                                                        | 2 (1%)                                                        | 60 (2%)         |
| Cardiovascular mortality; n (%)         | 195 (78%)                                                                        | 6 (2%)                                                        | 48 (1%)         | 127 (79%)                                                                        | 1 (1%)                                                        | 27 (1%)         |
| Mortality from bleeding; n (%)          | 7 (3%)                                                                           | 0                                                             | 7 (0.1%)        | 4 (2%)                                                                           | 0                                                             | 6 (0.2%)        |
| Myocardial infarction; n (%)            | 3 (1%)                                                                           | 9 (3%)                                                        | 133 (3%)        | 2 (1%)                                                                           | 3 (2%)                                                        | 72 (3%)         |
| Stroke; n (%)                           | 1 (0.4%)                                                                         | 1 (0.4%)                                                      | 9 (0.2%)        | 1 (1%)                                                                           | 0                                                             | 5 (0.2%)        |
| Additional coronary intervention; n (%) | 8 (3%)                                                                           | 29 (11%)                                                      | 475 (10%)       | 6 (4%)                                                                           | 20 (14%)                                                      | 293 (11%)       |
| MACCE; n (%)                            | 203 (81%)                                                                        | 40 (15%)                                                      | 586 (12%)       | 133 (83%)                                                                        | 23 (16%)                                                      | 350 (14%)       |

ACS: acute coronary syndrome; CPRD: Clinical Practice Research Datalink; HES: Hospital Episode Statistics; MACCE: major adverse cardiovascular and cerebrovascular events; STEMI: ST-elevation myocardial infarction.

**Supplementary Table 3.** Crude and adjusted hazard ratios for association of antiplatelet prescription (AC vs. AP and AC vs AT) sensitivity analyses for the primary outcome in ACS and STEMI-only patients (2012-2017)

|                                                                                                                     | Acute coronary syndrome (ACS) |                    |                     |                                | STEMI-only          |                   |                   |                     |                                                                          |
|---------------------------------------------------------------------------------------------------------------------|-------------------------------|--------------------|---------------------|--------------------------------|---------------------|-------------------|-------------------|---------------------|--------------------------------------------------------------------------|
|                                                                                                                     | All<br>n=4689                 | Number of bleeds   |                     | HR (95% CI)                    | All<br>n=2587       | Number of bleeds  |                   |                     | HR (95% CI)                                                              |
|                                                                                                                     |                               | AC n=2769          | AT n=1920           |                                |                     | AC n=1023         | AP n=406          | AT n=1158           |                                                                          |
| <i>Sensitivity analyses for primary outcome (any bleeding)</i>                                                      |                               |                    |                     |                                |                     |                   |                   |                     |                                                                          |
| Multiple imputation for unknown intervention group                                                                  | 5209                          |                    |                     | 1.45 (1.28, 2.39) <sup>1</sup> | 2893 <sup>1</sup>   |                   |                   |                     | AP: 1.77 (1.21, 2.58) <sup>4</sup><br>AT: 1.47 (1.08, 2.00) <sup>4</sup> |
| Restricted to patients at low risk of bleeding; n (%)                                                               | 390/4409<br>(8.8%)            | 196/2565<br>(7.6%) | 194/1844<br>(10.5%) | 1.44 (1.16, 1.80) <sup>2</sup> | 248/2488<br>(10.0%) | 78/982<br>(7.9%)  | 45/394<br>(11.4%) | 125/1112<br>(11.2%) | AP: 1.76 (1.20, 2.58) <sup>5</sup><br>AT: 1.46 (1.07, 2.00) <sup>5</sup> |
| Primary adjusted analysis without censoring of any CPRD or HES bleed at transfer out or last collection date; n (%) | 427/4689<br>(9.7%)            | 215/2769<br>(7.8%) | 212/1920<br>(11.0%) | 1.46 (1.18, 1.80) <sup>3</sup> | 265/2587<br>(10.2%) | 81/1023<br>(7.9%) | 47/406<br>(11.6%) | 137/1158<br>(11.8%) | AP: 1.81 (1.24, 2.63) <sup>6</sup><br>AT: 1.53 (1.12, 2.07) <sup>6</sup> |

AC: aspirin and clopidogrel; CI: confidence interval; CPRD: Clinical Practice Research Datalink; HES: Hospital Episode Statistics; HR: hazard ratio; SA: sensitivity analysis. Models were adjusted for propensity scores (including year, age, gender, anticoagulants, ischaemic heart disease (ever), hypertension, myocardial infarction (ever), heart failure, STEMI, previous surgery [ACS]; including year, age, gender, myocardial infarction (ever), previous CABG/PCI, hypercholesterolaemia [STEMI]) and also adjusted for the following confounders which remained in the model after backwards elimination, these included: age, gender, BMI, ethnic group, smoking category, previous MI, previous CABG/PCI, previous bleed, previous surgery, previous ischaemic heart disease, diabetes, hypertension, hypercholesterolaemia, peripheral vascular disease, stroke, heart failure, peptic ulcer disease, haemodialysis or renal disease, cancer, clotting disorder, anaemia, liver cirrhosis, NSAIDs, steroids, PPIs, anticoagulants.



Supplementary Figure 3. Kaplan-Meier curves displaying cumulative all cause and cardiovascular mortality, mortality from bleeding and ischaemic events according to intervention group.

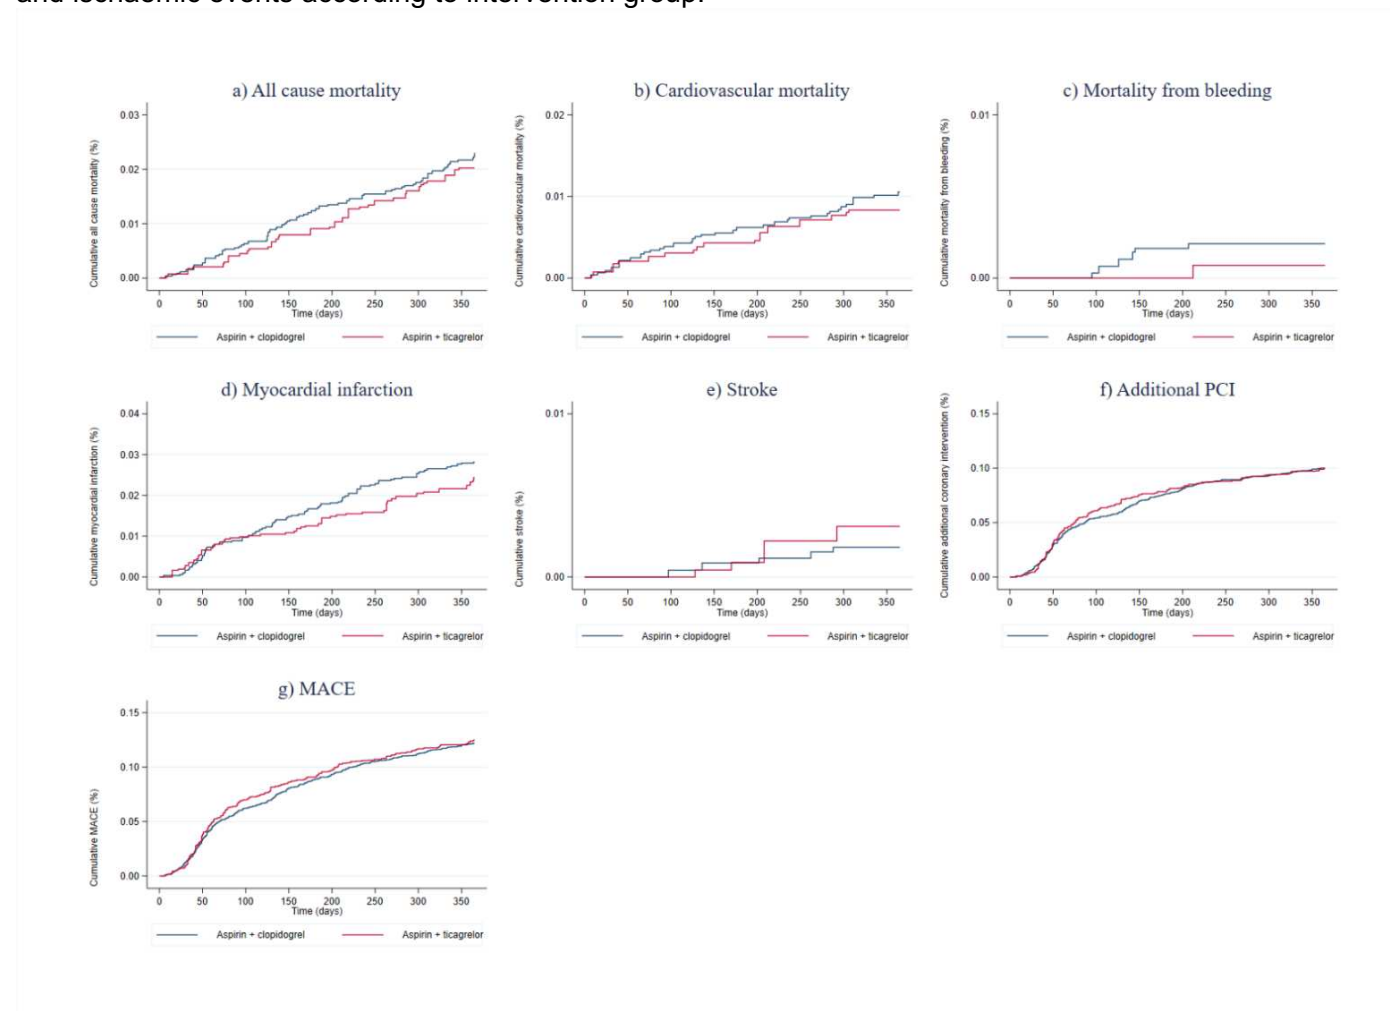

Supplementary Figure 4. Kaplan-Meier curves displaying cumulative all cause and cardiovascular mortality, mortality from bleeding and ischaemic events according to intervention group in the STEMI-only population

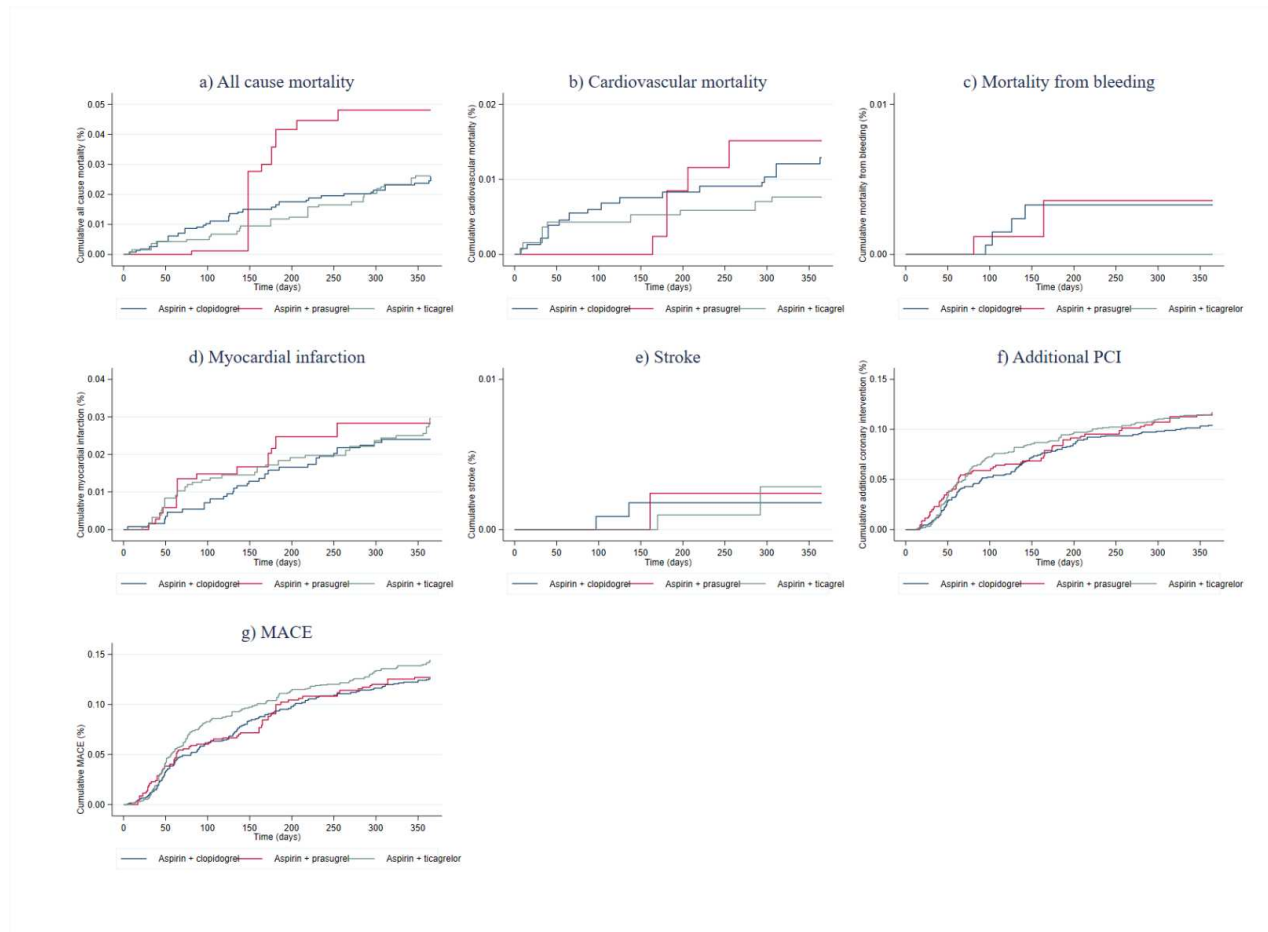

Supplement: openhrt-2022-001999supp001_data_supplement.pdf [file openhrt-2022-001999supp001_data_supplement.pdf]
